# Supplementary material
Source: publisher figshare collection journal article supplement (https://frontiersin.figshare.com/ndownloader/files/22302549)
Supplement: Supplementary file [file 22302549]

## Suppl. Figure 1

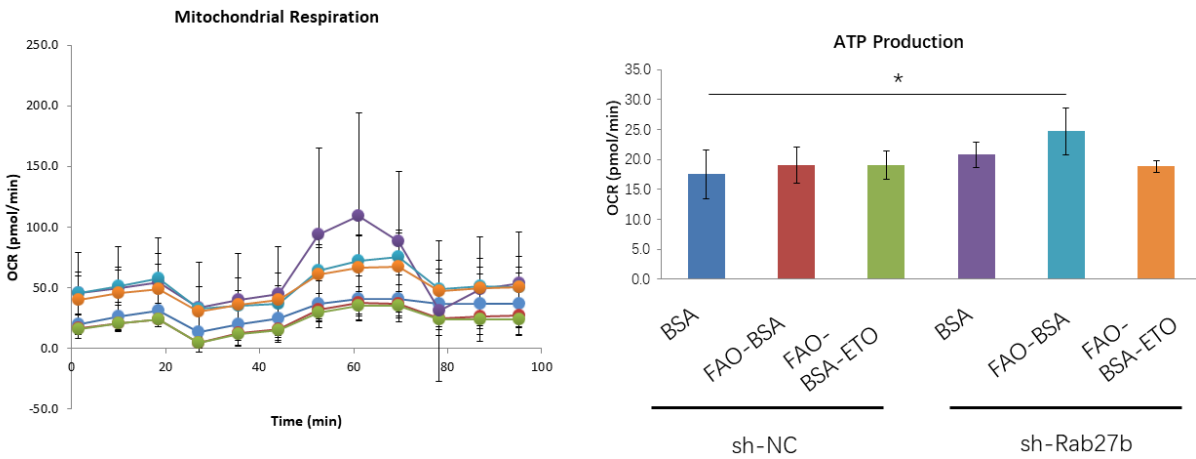

**Suppl. Figure 1.** Assessment of oxygen consumption rate (OCR) in C-MSC<sup>sh-NC</sup> and C-MSC<sup>sh-Rab27b</sup>. **(A)** Cells were cultured in substrate-limited medium overnight, and exposed sequentially to FAO medium, etomoxir (40 $\mu$ M), and Palmitate:BSA or BSA before OCR assay. Oxygen consumption rate (OCR) was measured over time using a Seahorse XFe24 Analyzer. Cell mito stress test was performed according to manufacturer's protocol. Measurements of ATP production were calculated from the OCR data. Results are presented as mean  $\pm$  SD (\*,  $P < 0.05$ ,  $n = 3-4$ ).

## Suppl. Figure 2

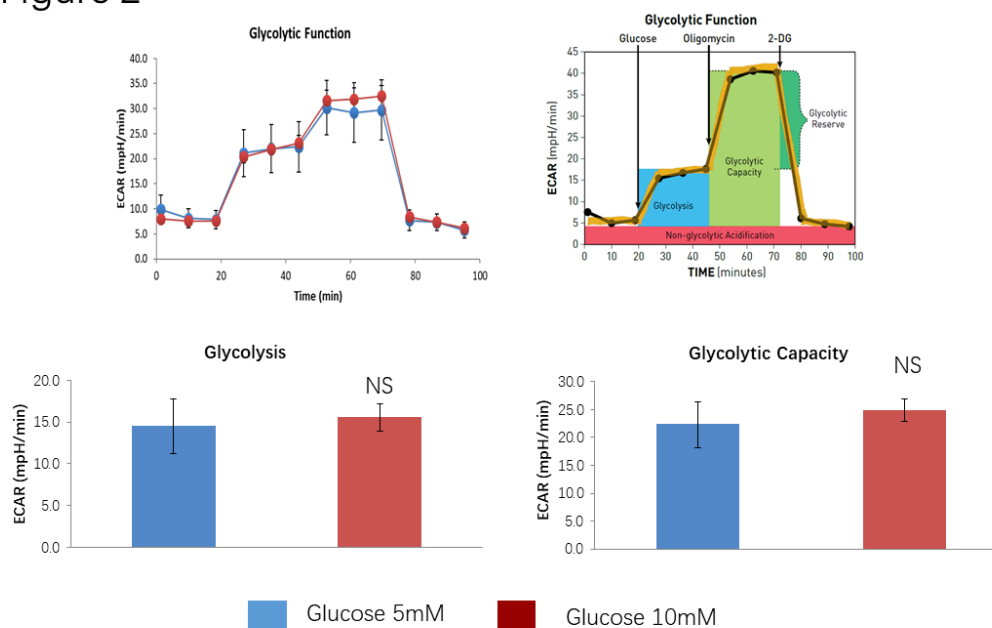

**Suppl. Figure 2.** Assessment of extracellular acidification rate (ECAR) in C-MSK. Cells were subjected to absence of glucose and sequentially to 5mM or 10mM glucose, rotenone/antimycin A and 2-DG. Extracellular acidification rate (ECAR) was measured over time using a Seahorse XFe24 Analyzer. Measurements of basal glycolysis, and glycolytic capacity were calculated from the ECAR data. Results are presented as mean  $\pm$  SD (NS,  $p > 0.05$ ,  $n = 5$ ).
